# Supplementary material for: Risk Factors for Mortality among Adult HIV/AIDS Patients Following Antiretroviral Therapy in Southwestern Ethiopia: An Assessment through Survival Models
Source: MDPI journal article supplement (doi:10.3390/ijerph14030296), 2017-03-12
Supplement: s1 [file s1]

# Supplementary Materials: Risk Factors for Mortality among Adult HIV/AIDS Patients Following Antiretroviral Therapy in Southwestern Ethiopia: An Assessment through Survival Models

Dinberu Seyoum, Jean-Marie Degryse, Yehenew Getachew Kifle, Ayele Taye, Mulualem Tadesse, Belay Birlie, Akalu Banbeta, Angel Rosas-Aguirre, Luc Duchateau and Niko Speybroeck

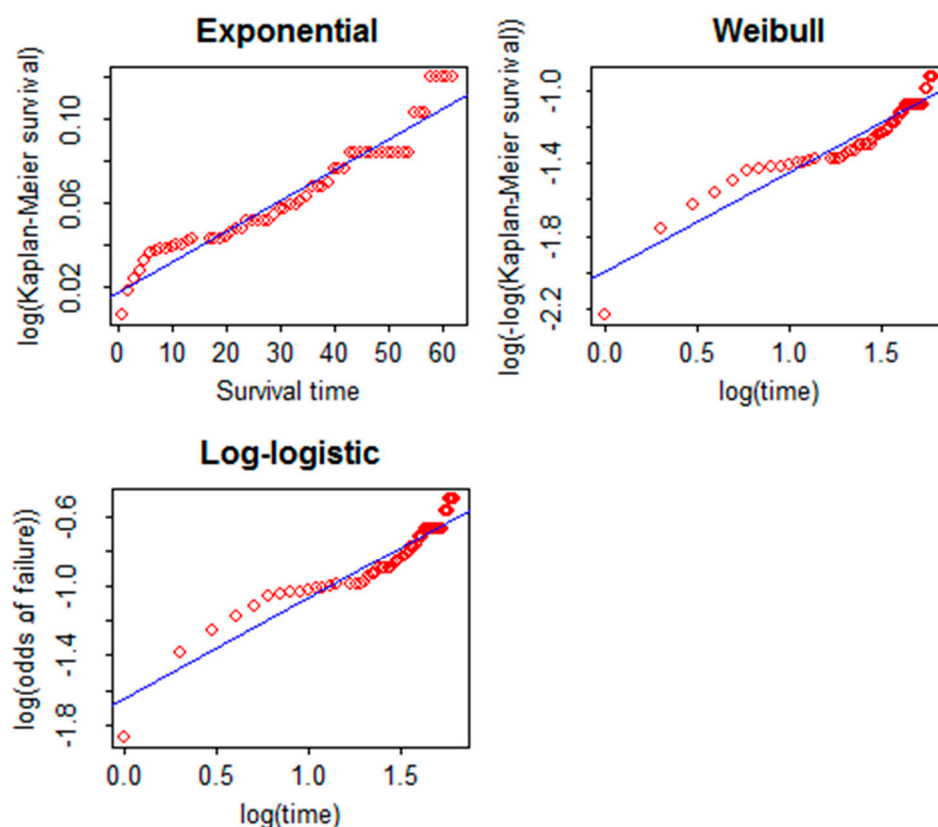

Figure S1. Different parametric models for data set in this study.

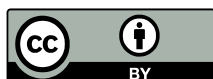

© 2017 by the authors; licensee MDPI, Basel, Switzerland. This article is an open access article distributed under the terms and conditions of the Creative Commons by Attribution (CC-BY) license (<http://creativecommons.org/licenses/by/4.0/>).
